# Supplementary material for: Amiodarone for arrhythmia in patients with Chagas disease: A systematic review and individual patient data meta-analysis
Source: PubMed Central journal article supplement (PMC6130878; doi:10.1371/journal.pntd.0006742), 2018-08-20
Supplement: pntd.0006742.s004.pdf [file pntd.0006742.s004.pdf]

### Methodological quality of the included studies using the 'Quality Assessment Tool for Before-After Studies with No Control Group'

| Before -After studies  |   |   |   |    |    |   |   |    |    |    |    |    |                       |
|------------------------|---|---|---|----|----|---|---|----|----|----|----|----|-----------------------|
| <i>Studies</i>         | 1 | 2 | 3 | 4  | 5  | 6 | 7 | 8  | 9  | 10 | 11 | 12 | <i>Quality rating</i> |
| Belotti et al., 1983   | Y | N | Y | NR | NR | Y | Y | NR | NR | Y  | NA | NA | Fair                  |
| Carrasco et al., 1985  | Y | N | Y | NR | NR | Y | Y | NR | NR | Y  | NA | NA | Fair                  |
| Chiale et al., 1984    | Y | N | Y | NR | NR | Y | Y | NR | NR | Y  | NA | NA | Fair                  |
| Greco et al., 1980     | Y | N | Y | NR | NR | Y | Y | NR | NR | N  | NA | NA | Poor                  |
| Haedo et al., 1986     | Y | N | Y | NR | NR | Y | Y | NR | NR | Y  | NA | NA | Fair                  |
| Prata et al., 1982     | N | N | Y | NR | NR | Y | Y | NR | NR | N  | NA | NA | Poor                  |
| Scanavaca et al., 1990 | Y | N | Y | NR | NR | Y | Y | NR | NR | Y  | NA | NA | Fair                  |
| Vichi et al., 1984     | N | N | Y | NR | NR | Y | Y | NR | NR | N  | NA | NA | Poor                  |

Abbreviations: Y, yes; N, no; NA, not applicable; NR, not reported. (1) objective clearly stated; (2) eligibility criteria described; (3) representative patient population; (4) all eligible participants enrolled in study; (5) sample size sufficient; (6) intervention description; (7) outcome measures specified; (8) outcome assessor blinded; (9) loss to follow-up; (10) statistical analysis of outcome measures before and after intervention; (11) interrupted time series design; (12) individual data used for group-level effects.

### Methodological quality of the included studies using RoB 2.0 tool (individually randomized, cross-over trials) and RoB 2.0 tool (individually randomized, parallel group trials)

| <b>Study, year</b>     | <b>Design</b>                               | <b>Randomization</b> | <b>Interventions</b> | <b>Missing outcome data</b> | <b>Outcome Measurement</b> | <b>Reported results</b> | <b>Overall</b> |
|------------------------|---------------------------------------------|----------------------|----------------------|-----------------------------|----------------------------|-------------------------|----------------|
| Rosenbaum et al., 1987 | Randomized Clinical trial (parallel design) | Some concerns        | Low risk             | Low risk                    | High risk                  | Low risk                | High risk      |
