# Supplementary material for: Amiodarone for arrhythmia in patients with Chagas disease: A systematic review and individual patient data meta-analysis
Source: PubMed Central journal article supplement (PMC6130878; doi:10.1371/journal.pntd.0006742), 2018-08-20

**CORNEAL MICRODEPOSITS**

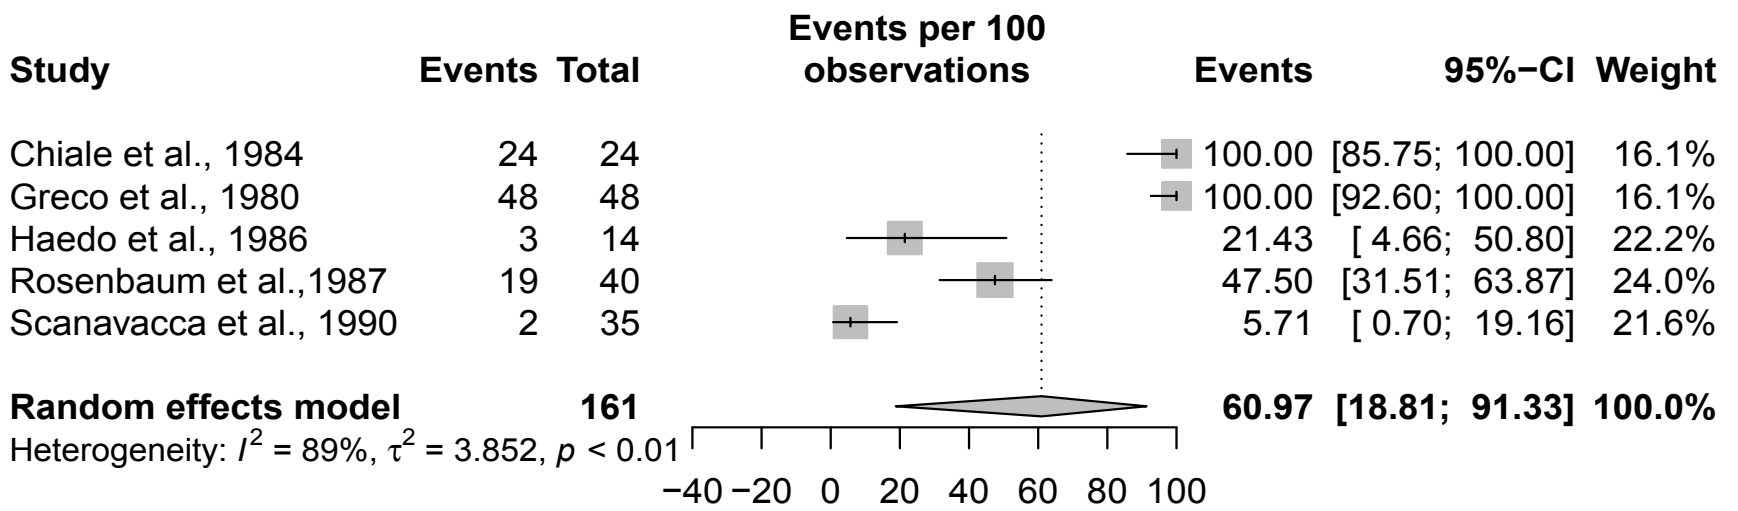

**GASTROINTESTINAL EVENTS**

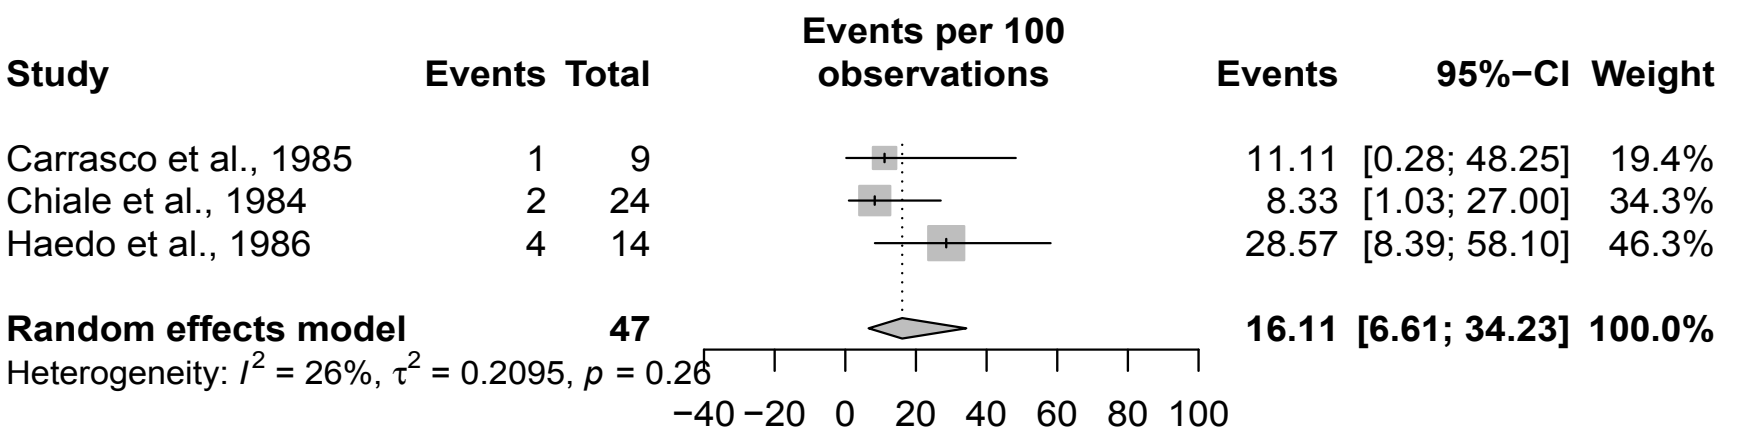

**SYNUS BRADICARDIA**

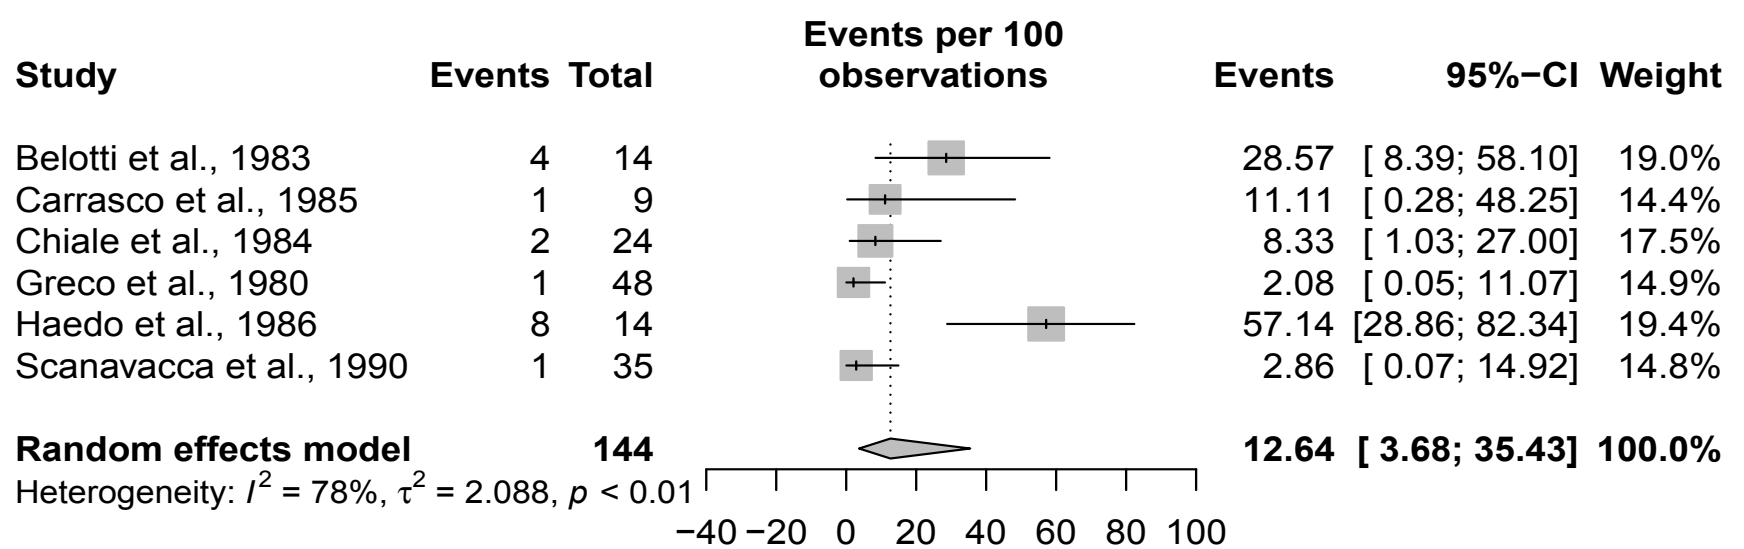

**DERMATOLOGICAL EVENTS**

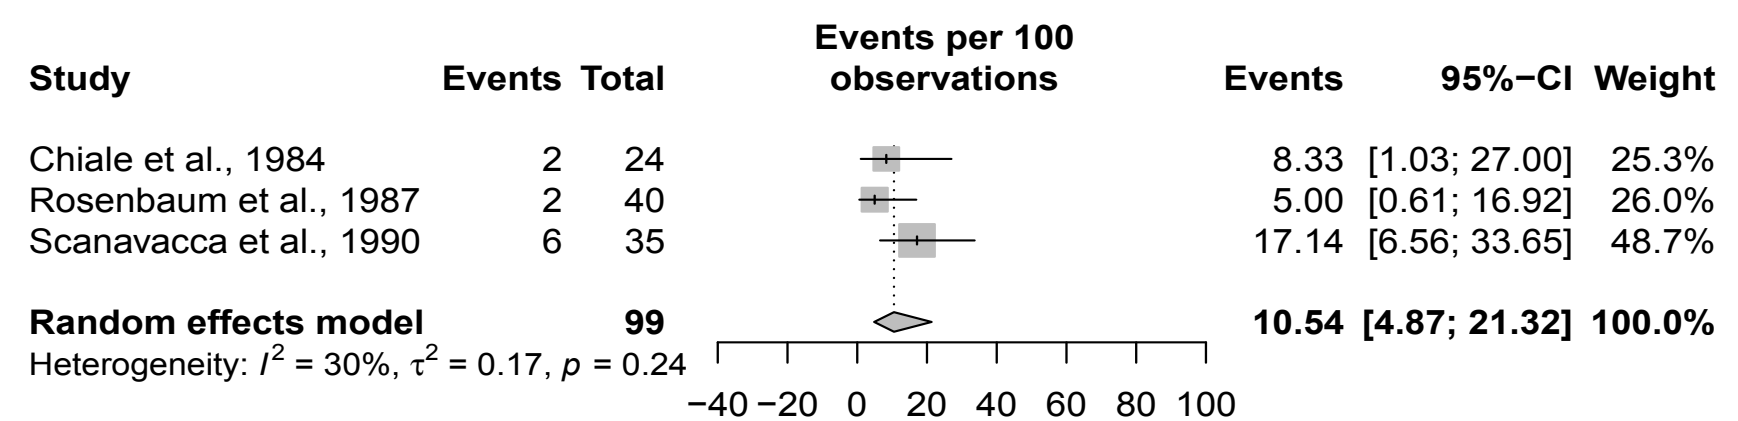

**DRUG DISCONTINUATION**

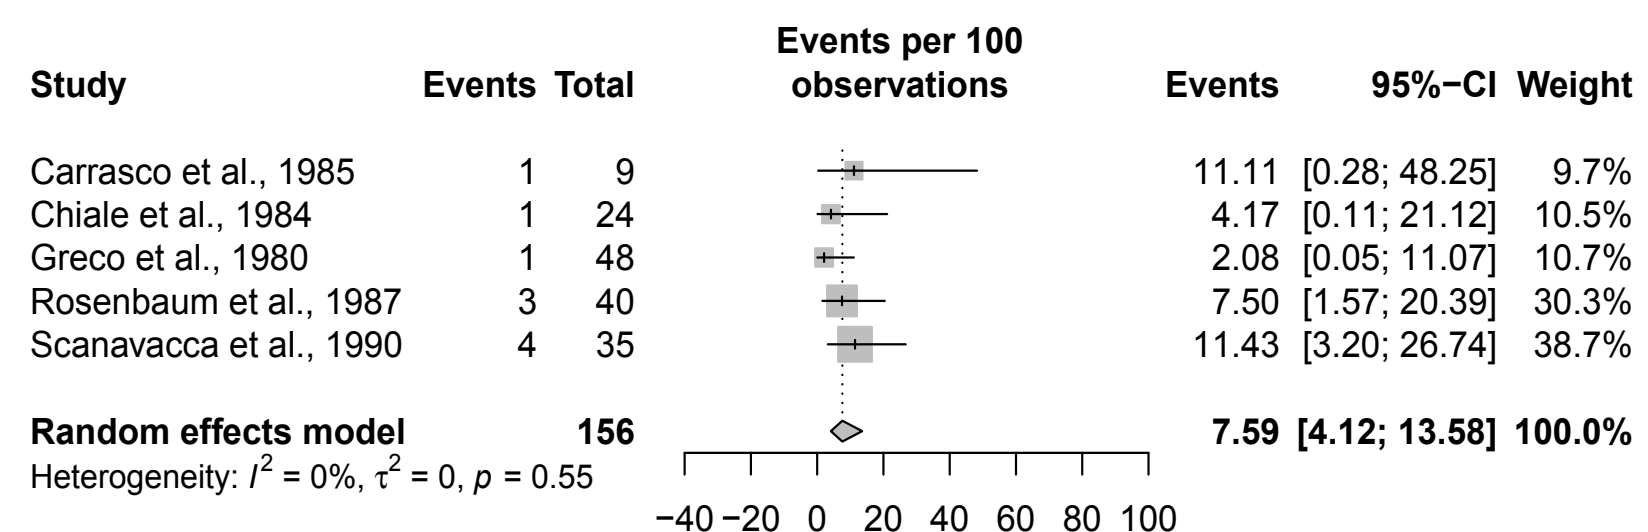

Supplement: pntd.0006742.s006.pdf [file pntd.0006742.s006.pdf]
